# Supplementary material for: MET inhibitor, capmatinib overcomes osimertinib resistance via suppression of MET/Akt/snail signaling in non-small cell lung cancer and decreased generation of cancer-associated fibroblasts
Source: PubMed Central journal article supplement (PMC7993678; doi:10.18632/aging.202547), 2021-02-17
Supplement: aging-13-202547-s001.pdf [file aging-13-202547-s001.pdf]

## SUPPLEMENTARY TABLE

Supplementary Table 1. Western blot antibodies sheet.

| No. | Target           | Dilution |            | Source         |
|-----|------------------|----------|------------|----------------|
| 1   | Vimentin         | 1:1000   | #5741      | Cell signaling |
| 2   | $\beta$ -catenin | 1:1000   | #8480      | Cell signaling |
| 3   | MMP9             | 1:1000   | #13667     | Cell signaling |
| 4   | E-cadherin       | 1:1000   | #14472     | Cell signaling |
| 5   | p-MET            | 1:500    | #3077      | Cell signaling |
| 6   | MET              | 1:1000   | #8198      | Cell signaling |
| 7   | p-EGFR           | 1:500    | ab40815    | Cell signaling |
| 8   | p-Akt            | 1:500    | ab38449    | abcam          |
| 9   | Snail            | 1:1000   | ab216347   | abcam          |
| 10  | $\alpha$ -SMA    | 1:1000   | ab7817     | abcam          |
| 11  | $\beta$ -actin   | 1:10000  | 10494-1-AP | 60008-1-Ig     |
